# Supplementary material for: Controllable synthesis of molybdenum-based electrocatalysts for a hydrogen evolution reaction
Source: Royal Society of Chemistry journal article supplement (doi:10.1039/c6ta10758c), 2017-01-01
Supplement: c6ta10758c1.pdf [file c6ta10758c1.pdf]

## Supplementary Information

### **Controllable Synthesis of Molybdenum-Based Electrocatalysts for Hydrogen Evolution Reaction**

*Junpo Guo<sup>‡</sup>, Jie Wang<sup>‡</sup>, Zexing Wu, Wen Lei, Jing Zhu, Kedong Xia and Deli Wang\**

*Key Laboratory of Material Chemistry for Energy Conversion and Storage (Huazhong University of Science and Technology), Ministry of Education, Hubei Key Laboratory of Material Chemistry and Service Failure, School of Chemistry and Chemical Engineering, Huazhong University of Science and Technology, Wuhan, 430074, P.R. China. \*E-mail: wangdl81125@hust.edu.cn.*

*<sup>‡</sup> These authors contributed equally to this work*

**Table S1.** Structural parameters and particle sizes for molybdenum-based compounds.

|                     | Lattice plane | 2 $\theta$ , degree | D <sub>1</sub> , nm | $\bar{D}$ , nm | D <sub>2</sub> , nm |
|---------------------|---------------|---------------------|---------------------|----------------|---------------------|
| MoO <sub>2</sub> /C | (111)         | 26.13               | 7.43                | 8.49           | 8.3                 |
|                     | (211)         | 37.08               | 8.84                |                |                     |
|                     | (312)         | 49.54               | 9.21                |                |                     |
| MoC/C               | (111)         | 36.39               | 3.64                | 3.26           | 3.2                 |
|                     | (200)         | 42.27               | 2.74                |                |                     |
|                     | (220)         | 61.31               | 3.41                |                |                     |
| Mo <sub>2</sub> C/C | (002)         | 38.04               | 3.16                | 3.0            | 2.5                 |
|                     | (101)         | 39.58               | 3.06                |                |                     |
|                     | (110)         | 61.86               | 2.67                |                |                     |

D1: Particle sizes calculated from XRD patterns for Mo composite catalysts; D : Average particle sizes; D2: Particle sizes obtained from TEM images.

**Table S2.** Comparison of the HER performance of molybdenum compounds reported in literature in acid media.

| Catalysts                          | Tafel slope<br>mV dec <sup>-1</sup> | $j_0$<br>mA cm <sup>-2</sup> | $\eta_{10}$<br>mV | Electrolyte                          | Refs |
|------------------------------------|-------------------------------------|------------------------------|-------------------|--------------------------------------|------|
| Bulk Mo <sub>2</sub> C             | 56                                  | 1.3*10 <sup>-3</sup>         | 210               | 1 M H <sub>2</sub> SO <sub>4</sub>   | 1    |
| Np-Mo <sub>2</sub> C NWS           | 53                                  | 1.4*10 <sup>-3</sup>         | 130               | 0.5 M H <sub>2</sub> SO <sub>4</sub> | 2    |
| Mo <sub>2</sub> C/CNT              | 55.2                                | 1.4*10 <sup>-2</sup>         | 152               | 0.1 M HClO <sub>4</sub>              | 3    |
| Mo <sub>2</sub> C/GCS              | 62.6                                | 1.25*10 <sup>-2</sup>        | 200               | 0.5 M H <sub>2</sub> SO <sub>4</sub> | 4    |
| Mo <sub>2</sub> C/CNT-GR           | 58                                  | 6.2*10 <sup>-2</sup>         | 130               | 0.5 M H <sub>2</sub> SO <sub>4</sub> | 5    |
| Mo <sub>2</sub> C-RGO              | 54                                  |                              | 130               | 0.5 M H <sub>2</sub> SO <sub>4</sub> | 6    |
| Mo <sub>2</sub> C-NCNT             | 71                                  | 0.115                        | 147               | 0.5 M H <sub>2</sub> SO <sub>4</sub> | 7    |
| MoC <sub>x</sub>                   | 53                                  | 2.3*10 <sup>-2</sup>         | 142               | 0.5 M H <sub>2</sub> SO <sub>4</sub> | 8    |
| MoO <sub>2</sub> /RGO              | 68                                  |                              | 310               | 0.5 M H <sub>2</sub> SO <sub>4</sub> | 9    |
| MoS <sub>2</sub> /MoO <sub>2</sub> | 76                                  |                              | 240               | 0.5 M H <sub>2</sub> SO <sub>4</sub> | 10   |
| MoC-G                              | 88                                  | 2.6*10 <sup>-2</sup>         | 221               | 0.5 M H <sub>2</sub> SO <sub>4</sub> | 11   |
| MoC@NC                             | 68                                  | 1.7*10 <sup>-2</sup>         | 210               | 0.5 M H <sub>2</sub> SO <sub>4</sub> | 12   |
| MoO <sub>2</sub> /C                | 107.1                               | 0.05                         | 246               | 0.5 M H <sub>2</sub> SO <sub>4</sub> | This |
| MoC/C                              | 91.1                                | 0.13                         | 179               | 0.5 M H <sub>2</sub> SO <sub>4</sub> |      |
| Mo <sub>2</sub> C/C                | 75.1                                | 0.36                         | 135               | 0.5 M H <sub>2</sub> SO <sub>4</sub> | work |

**Table S3.** Comparison of the HER performance of molybdenum compounds reported in literature in alkaline media.

| Catalysts              | Tafel slope<br>mV dec <sup>-1</sup> | $j_0$<br>mA cm <sup>-2</sup> | $\eta_{10}$<br>mV | Electrolyte | Refs |
|------------------------|-------------------------------------|------------------------------|-------------------|-------------|------|
| MoC <sub>x</sub>       | 59                                  | $2.9 \times 10^{-2}$         | 151               | 1M KOH      | 8    |
| NiMo <sub>2</sub> C/NF | 36.8                                | 0.51                         | 47                | 6M KOH      | 10   |
| Mo <sub>2</sub> C      | 58                                  |                              | 176               | 1M KOH      | 13   |
| nanoparticle           |                                     |                              |                   |             |      |
| Mo <sub>2</sub> C      | 45                                  | $1.1 \times 10^{-2}$         | 130               | 1M KOH      | 14   |
| nanorad                |                                     |                              |                   |             |      |
| Ni-MoO <sub>2</sub>    |                                     |                              | 257               | 1M KOH      | 7    |
| MoO <sub>2</sub> /C    | 88.0                                | 0.05                         | 184               | 1M KOH      | This |
| MoC/C                  | 75.1                                | 0.14                         | 138               | 1M KOH      |      |
| Mo <sub>2</sub> C/C    | 62.2                                | 0.25                         | 96                | 1M KOH      | work |

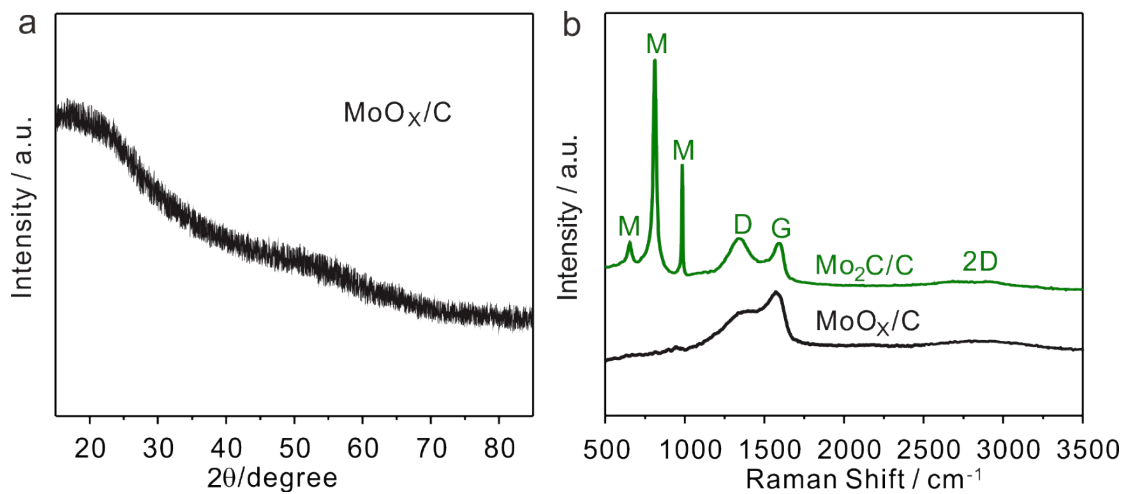

**Figure S1.** (a) XRD pattern of solvothermal product; (b) Raman spectra of solvothermal product and  $\text{Mo}_2\text{C}/\text{C}$  nanocatalyst.

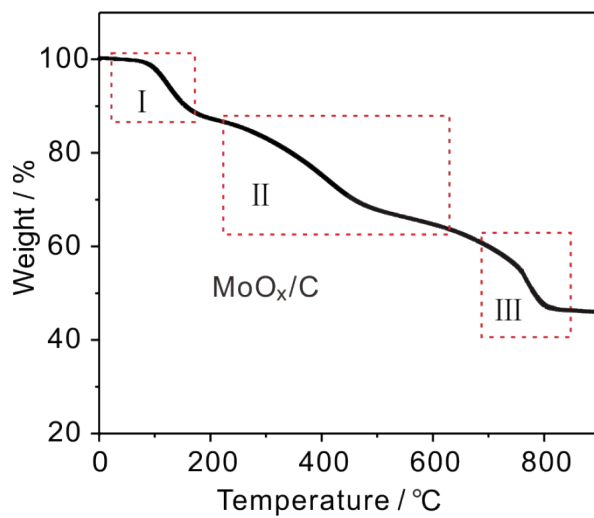

**Figure S2.** Thermo gravimetric analysis (TGA) of solvothermal product tested under flowing  $\text{N}_2$  atmosphere.

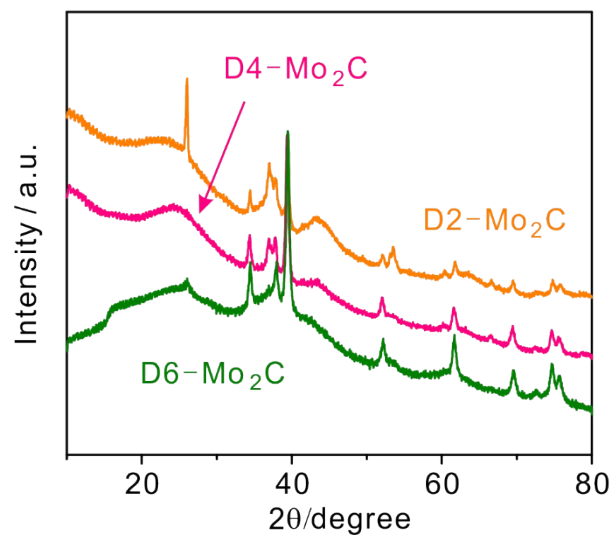

**Figure S3.** Powder XRD patterns of D2-Mo<sub>2</sub>C, D4-Mo<sub>2</sub>C and D6-Mo<sub>2</sub>C.

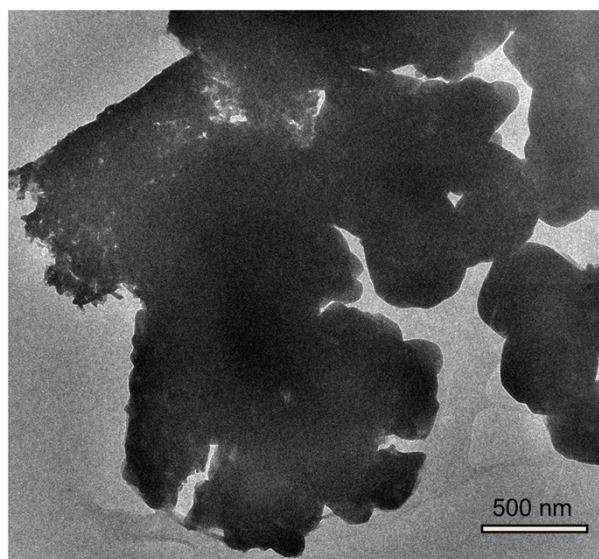

**Figure S4.** TEM images of D4-Mo<sub>2</sub>C

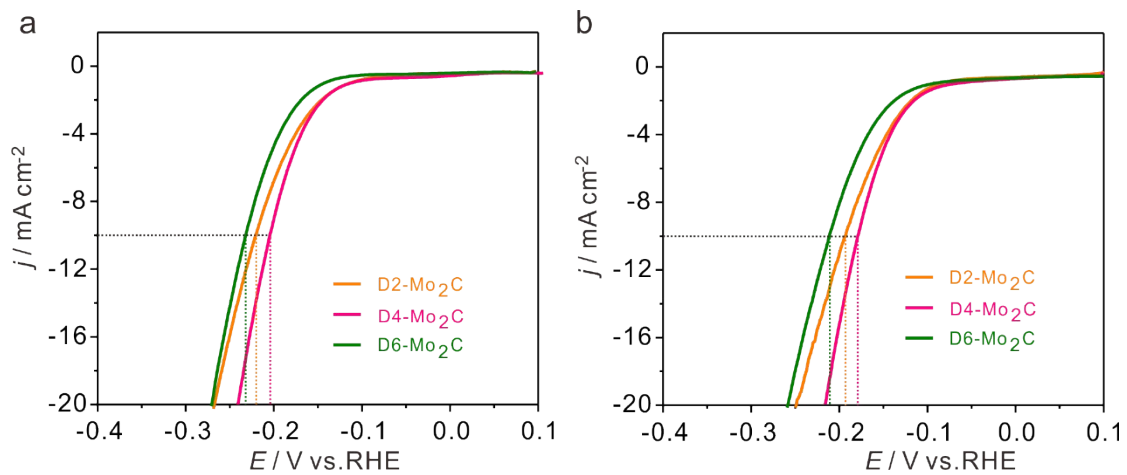

**Figure S5.** Polarization curves of D2-Mo<sub>2</sub>C, D4-Mo<sub>2</sub>C and D6-Mo<sub>2</sub>C in 0.5 M H<sub>2</sub>SO<sub>4</sub> solution (a) and 1 M KOH solution (b).

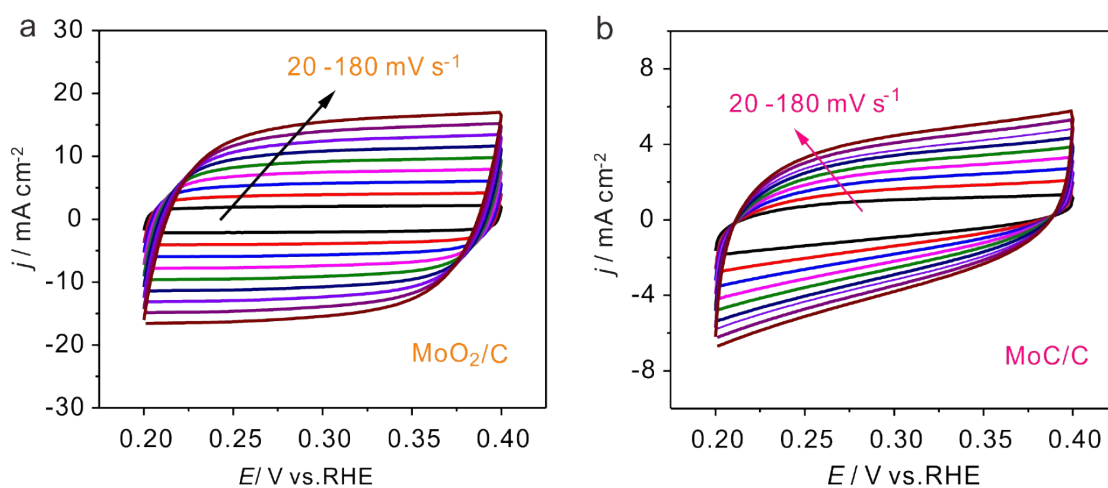

**Figure S6.** Cyclic voltammograms (CVs) of MoO<sub>2</sub>/C (a) and MoC/C (b) in 0.5 M H<sub>2</sub>SO<sub>4</sub> solution between 0.2 V and 0.4 V at scan rates ranging from 20 to 180  $\text{mV s}^{-1}$ .

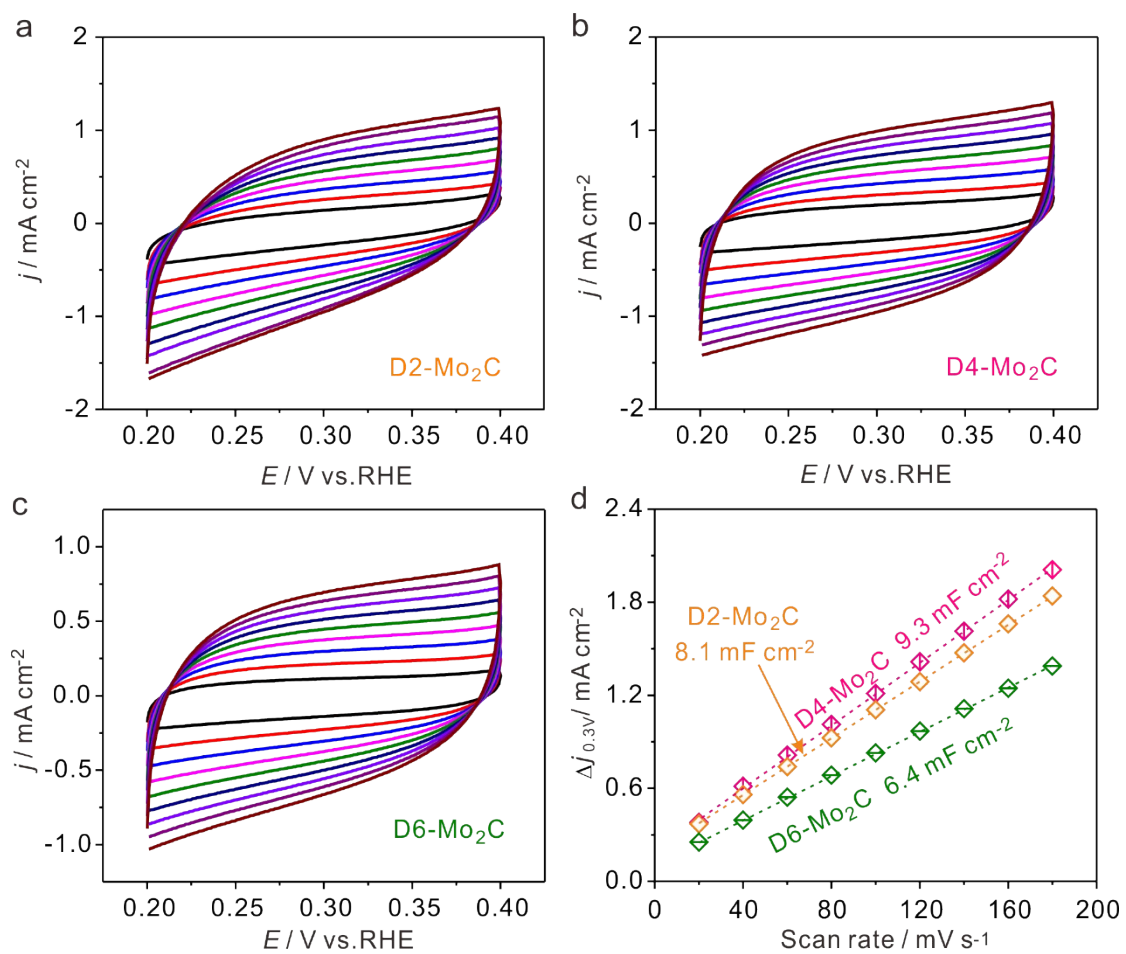

**Fig S7.** Cyclic voltammograms (CVs) of D2-Mo<sub>2</sub>C (a), D4-Mo<sub>2</sub>C (b) and D6-Mo<sub>2</sub>C (c) in 0.5 M H<sub>2</sub>SO<sub>4</sub> solution between 0.2 V and 0.4 V at scan rates ranging from 20 to 180  $\text{mV s}^{-1}$ ; (d) Capacitive current at 0.3 V as a function of scan rate ( $\Delta j_0 = j_a - j_c$ ).

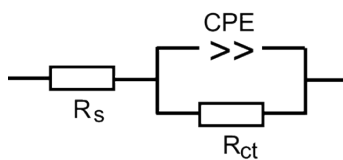

**Figure S8.** Electrical Equivalent circuit models for fitting the EIS response on Mo-based catalysts, where  $R_s$  is the solution resistance,  $R_{ct}$  represents the charge transfer resistance, and the double layer capacitance is represented by the elements CPE.

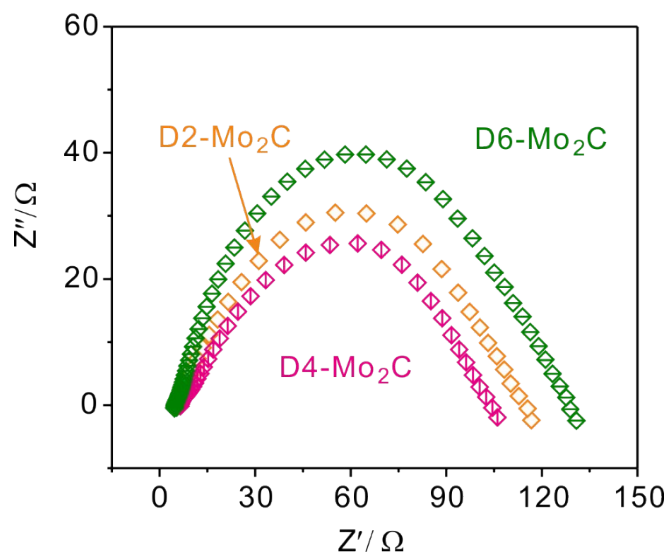

**Figure S9.** Nyquist plots of D2-Mo<sub>2</sub>C, D4-Mo<sub>2</sub>C and D6-Mo<sub>2</sub>C recorded at 150 mV in 0.5 M H<sub>2</sub>SO<sub>4</sub> solution.

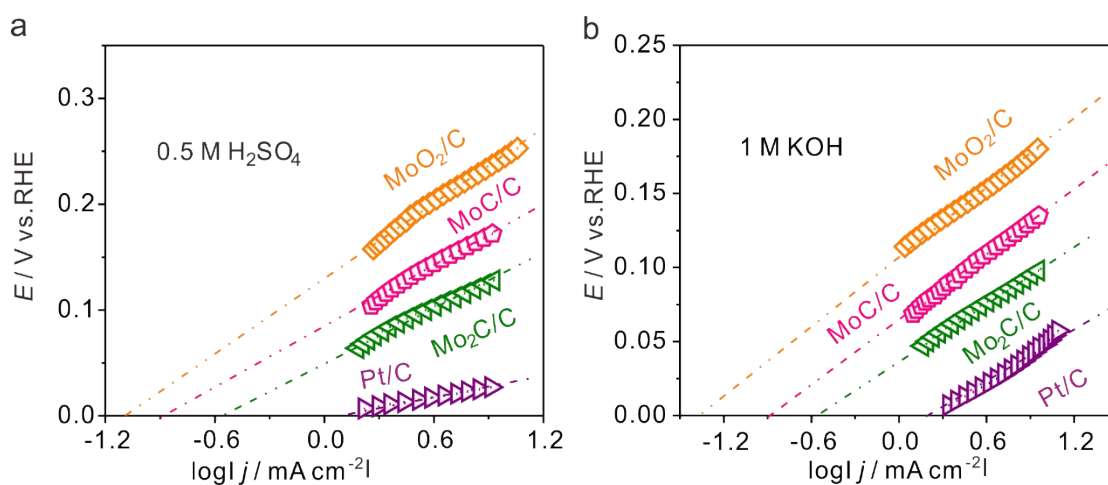

**Figure S10.** Tafel plots and the corresponding exchange current density of MoO<sub>2</sub>/C, MoC/C, Mo<sub>2</sub>C/C and Pt/C in 0.5 M H<sub>2</sub>SO<sub>4</sub> (a) and 1 M KOH solution (b).

- 1 H. Vrubel and X. Hu, *Angew. Chem.*, 2012, **124**, 12875-12878.
- 2 L. Liao, S. Wang, J. Xiao, X. Bian, Y. Zhang, M. D. Scanlon, X. Hu, Y. Tang, B. Liu and H. H. Girault, *Energy Environ. Sci.*, 2014, **7**, 387-392.
- 3 W.-F. Chen, C.-H. Wang, K. Sasaki, N. Marinkovic, W. Xu, J. Muckerman, Y. Zhu and R. Adzic, *Energy Environ. Sci.*, 2013, **6**, 943-951.
- 4 W. Cui, N. Cheng, Q. Liu, C. Ge, A. M. Asiri and X. Sun, *ACS Catal.* 2014, **4**, 2658-2661.
- 5 D. H. Youn, S. Han, J. Y. Kim, H. Park, S. H. Choi and J. S. Lee, *ACS Nano*, 2014, **8**, 5164-5173.
- 6 L. F. Pan, Y. H. Li, S. Yang, P. F. Liu, M. Q. Yu and H. G. Yang, *Chem. Commun.*, 2014, **50**, 13135-13137.



- 7 K. Zhang, Y. Zhao, D. Fu and Y. Chen, *J. Mater. Chem. A*, 2015, **3**, 5783-5788.
- 8 H. B. Wu, B. Y. Xia, L. Yu, X.-Y. Yu, X. W. D. Lou, *Nat. Commun.*, 2015, **6**, 6512-6519.
- 9 L. Wu, X. Wang, Y. Sun, Y. Liu and J. Li, *Nanoscale*, 2015, **7**, 7040-7044.
- 10 L. Yang, W. Zhou, D. Hou, K. Zhou, G. Li, Z. Tang, L. Li and S. Chen, *Nanoscale*, 2015, **7**, 5203-5208.
- 11 C. He and J. Tao, *Chem. Commun.*, 2015, **51**, 8323-8325.
- 12 R. Ma, Y. Zhou, Y. Chen, P. Li, Q. Liu and J. Wang, *Angew. Chem. Int. Ed.*, 2015, **54**, 14723-14727.
- 13 L. Ma, L. R. L. Ting, V. Molinari, C. Giordano and B. S. Yeo, *J. Mater. Chem. A*, 2015, **3**, 8361-8368.
- 14 P. Xiao, Y. Yan, X. Ge, Z. Liu, J.-Y. Wang and X. Wang, *Appl. Catal. B: Environ.*, 2014, **154**, 232-237.
